# Supplementary material for: Kinetics of actin networks formation measured by time resolved particle-tracking microrheology
Source: Royal Society of Chemistry journal article supplement (doi:10.1039/d0sm00290a), 2020-01-01
Supplement: d0sm00290a1.pdf [file d0sm00290a1.pdf]

## Supplementary Material

### Calculation of filament length:

Filament length was extracted from Eq.(2),

$$(2) \quad \frac{\eta_{\text{eff}}}{\eta_0} = A \left( \frac{L}{D} \right)^2 + 1 \quad ; \quad A = \frac{3}{4} \frac{\varphi}{\ln(1/\varphi)} \left( 1 - \frac{\ln(\ln(1/\varphi))}{\ln(1/\varphi)} + \frac{0.6634}{\ln(1/\varphi)} \right) .$$

Since the filaments are double helical rigid rods, we assumed that the expression for their length is:

$$L = \frac{2}{3} \cdot \frac{d \cdot N_m}{nuc} ,$$

where  $d$  is the actin monomer diameter,  $N_m$  is the number of polymerized monomers, and  $nuc$  is the number of stable nuclei which we assumed do not change during the polymerization process.

$\varphi$  is related to  $N_m$  by:  $\varphi = \frac{V_m \cdot N_m}{V_{\text{tot}}}$ , where  $V_m$  is the volume of G-actin monomer and  $V_{\text{tot}}$  is the total volume of the sample. Then,  $L$  and  $\varphi$  could be related through  $N_m$  and plugged into Eq.(2):

$$\frac{\eta_{\text{eff}}}{\eta_0} = \alpha \frac{\varphi^3}{\ln(1/\varphi) \cdot nuc^2} \left( 1 - \frac{\ln(\ln(1/\varphi))}{\ln(1/\varphi)} + \frac{0.6634}{\ln(1/\varphi)} \right) + 1 \quad ; \quad \alpha = \frac{16}{27} \left( \frac{d \cdot V_{\text{tot}}}{D \cdot V_m} \right)^2 .$$

In order to find the parameter "nuc" for each initial actin monomer concentration, we used the known  $\varphi$  at the end of the polymerization process (where all the available

monomers were polymerized), and the corresponding ratio  $\frac{\eta_{\text{eff}}}{\eta_0}$  obtained from the experiment.

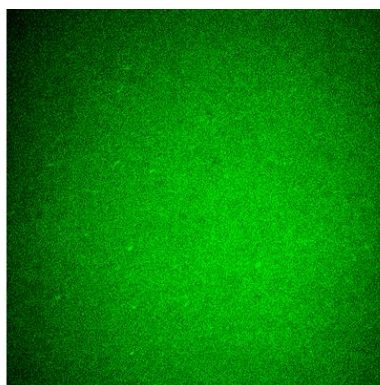

**Fig. S1** Fluorescence image of an entangled stained with a fluorescent dye actin network, with initial monomer concentration of  $c_A = 24 \mu M$ . Stained actin filaments cannot be resolved optically at this concentration.

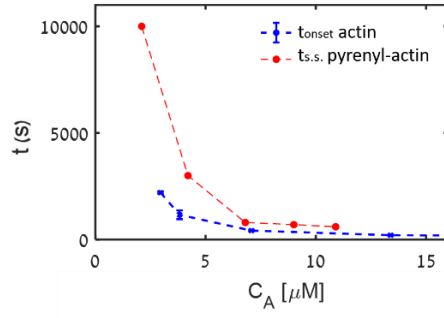

**Fig. S2** Comparison between the effect of actin concentration on the time it takes a network to form, tonset, and the time it takes a pyrenyl-actin to polymerize and reach a steady-state, ts.s. according to ref. [27]. The pyrene assay measurements represent the upper limit for the network formation time obtained in our method.

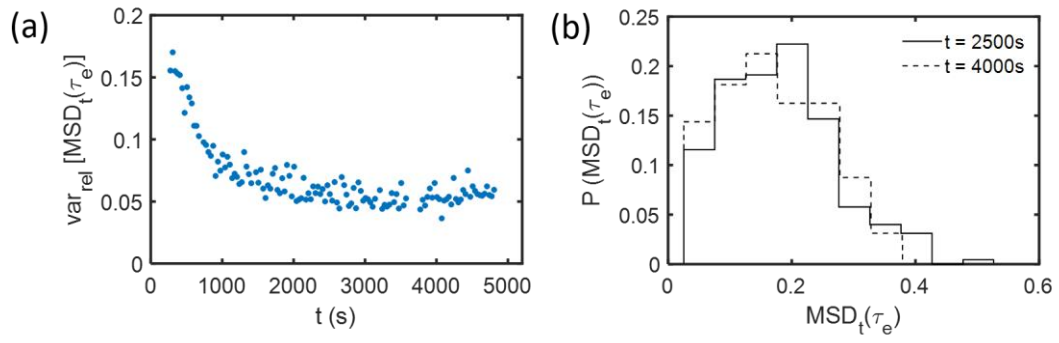

**Fig. S3** The temporal evolution of the structural heterogeneity of entangled actin network with initial monomer concentration of  $c_A = 4 \mu M$ . (a) The relative variance (var/mean) of the time averaged MSD of a single particle at lag time  $\tau_e = 1/\omega_e$ , (b) Probability distribution of the single particle time averaged MSD with a lag time of  $\tau_e$  at  $t = 2500$  s and  $4000$  s of the self-assembly process. The heterogeneity decreases during the first  $2500$  s of the polymerization process. At the relaxation period (i.e.  $2500 \text{ s} < t < 4000 \text{ s}$ ), no significant change in heterogeneity is observed.

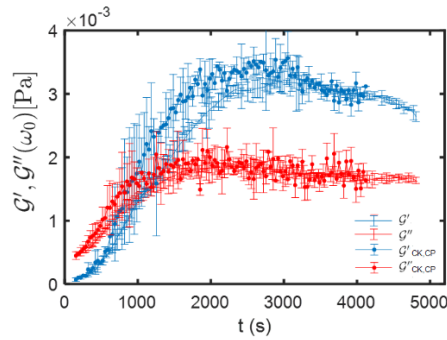

**Fig. S4** Time evolution of  $G'(\omega_0)$  and  $G''(\omega_0)$  for intermediate monomer concentrations of  $4\mu M$  with ATP regeneration system including Creatine Phosphate (CP) and Creatine Kinase (CK). Both measurements show the same behavior, i.e. the overshoot does not derive from lack of ATP.

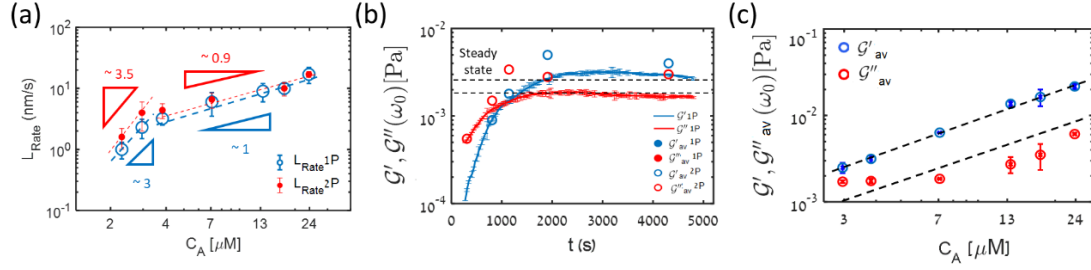

**Fig. S5** Comparison between 1P and 2P microrheology of the kinetics of ATP-assisted self-assembly. (a) A comparison of the initial elongation rate  $L_{\text{Rate}}$  extracted by 1P and 2P microrheology. Clearly, both methods agree well, demonstrating two regimes of concentration dependence. (b) Time evolution of  $G'(\omega_0)$  and  $G''(\omega_0)$  for monomer concentrations varying from  $4\mu\text{M}$  as obtained from 1P and 2P microrheology calculations. The overshoot in  $G'$  is clearly seen in both cases. Dashed lines indicate the values of  $G'$ ,  $G''$  at steady state. (c) The value of  $G'$ ,  $G''$  at steady state are those obtained by averaging the value obtained for time windows larger than 3000 s in which the system arrives close to steady state.

| $C_A$<br>( $\mu\text{M}$ ) | $c_a$<br>(mg/ml) | $\xi$<br>(nm) | $l_e$<br>(nm) | dt<br>(nm) | $\tau_e$ (s) | $\omega_e$<br>(Hz) | $\omega_e$<br>(measured)<br>(Hz) | $\tau_{\text{rep}}$<br>(s)<br>2P | $\tau_{\text{rep}}$<br>(s)<br>1P | $\omega_{\text{rep}}$<br>(mHz)<br>2P | $L_{2P}$<br>(nm) | $L_{1P}$<br>(nm) | $t_{\text{onset}}$<br>(s) |
|----------------------------|------------------|---------------|---------------|------------|--------------|--------------------|----------------------------------|----------------------------------|----------------------------------|--------------------------------------|------------------|------------------|---------------------------|
| 2.37                       | 0.10             | 950           | 1691          | 534        | 0.557        | 1.8                | 0.3                              | 1704                             | 21                               | 0.6                                  | 13120            | 3050             | ---                       |
| 2.97                       | 0.12             | 850           | 1547          | 467        | 0.398        | 2.5                | 0.9                              | 206                              | 21                               | 5                                    | 6257             | 2900             | 2200                      |
| 3.81                       | 0.16             | 750           | 1400          | 402        | 0.273        | 3.7                | 0.6                              | 41                               | 17                               | 25                                   | 3500             | 2606             | 1161                      |
| 7.08                       | 0.30             | 550           | 1092          | 277        | 0.108        | 9.3                | ---                              | 51                               | 12                               | 20                                   | 3400             | 2100             | 420                       |
| 13.39                      | 0.56             | 400           | 847           | 189        | 0.042        | 24.0               | ---                              | 17                               | 17                               | 60                                   | 2100             | 2100             | 203                       |
| 17.49                      | 0.73             | 350           | 761           | 161        | 0.028        | 35.8               | ---                              | 28                               | 28                               | 31                                   | 2500             | 2500             | 190                       |
| 23.81                      | 1.00             | 300           | 673           | 134        | 0.018        | 56.5               | ---                              | 33                               | 33                               | 30                                   | 2400             | 2400             | 175                       |

**Table S1.** Theoretical approximated steady state values according to Eq. (3) and [63]. It is important to note that the calculated final lengths in all concentrations except for  $2\mu\text{M}$  are estimated and relative only since the model of diffusing rigid rods does not reliable for entangled networks. Apparently, only at low actin monomer concentrations  $\tau_{\text{rep}}$  is high enough to reach frequency window (e) in Fig.7 in the main text.

| t(s) | Window<br>in Fig.1 | $C_A$<br>( $\mu\text{M}$ ) | $C_{\text{polymerized}}(t)$<br>( $\mu\text{M}$ ) | $l_e(t)$<br>(nm) | dt(t)<br>(nm) | $\tau_e$ (s) | $\omega_e$<br>(Hz) | $\omega_e$<br>(measured)<br>(Hz) | $\tau_{\text{rep}}$<br>(s)<br>2P | $\omega_{\text{rep}}$<br>(mHz)<br>2P | $L_{2P}(t)$<br>(nm) |
|------|--------------------|----------------------------|--------------------------------------------------|------------------|---------------|--------------|--------------------|----------------------------------|----------------------------------|--------------------------------------|---------------------|
| 150  | (b)                | 2.97                       | 0.203                                            | 4520             | ---           | ---          | ---                | ---                              | ---                              | ---                                  | 429                 |
| 150  | (c)                | 17.49                      | 16.09                                            | 787              | 169           | 0.032        | 31.6               | ---                              | 24                               | 42                                   | 2300                |
| 210  | (d)                | 17.49                      | 16.30                                            | 783              | 168           | 0.031        | 32.1               | ---                              | 25                               | 40                                   | 2330                |
| 3600 | (e)                | 2.97                       | 0.963                                            | 1547             | 467           | 0.398        | 2.5                | 0.6                              | 206                              | 5                                    | 6252                |

**Table S2.** Theoretical approximated values related to Fig.1. Reptation time increases with window number (b-e) as expected. It is important to note that the calculated temporal lengths in  $17\mu\text{M}$  at 210s and  $3\mu\text{M}$  at 3600s are estimated and relative only since the model of diffusing rigid rods does not reliable for entangled networks. The values for  $\tau_e$ ,  $\omega_e$ ,  $\tau_{\text{rep}}$  and  $\omega_{\text{rep}}$  cannot be calculated for  $C_A = 3\mu\text{M}$  (window (b)) since  $l_e > L_{2P}(t)$ .
